# Supplementary material
Source: MDPI journal article supplement (https://www.mdpi.com/2073-4441/13/19/2707)
Supplement: s1 [file s1]

## Supplementary

Table S1: Assessing NDVI *C* against control points collected in the field.

| Land cover      | NDVI        | NDVI <i>C</i> | Fixed <i>C</i> |
|-----------------|-------------|---------------|----------------|
| grasslands      | 0.48        | 0.16          | 0.12           |
| bare/degraded   | 0.23        | 0.56          | 1              |
| grasslands      | 0.54        | 0.09          | 0.12           |
| bare/degraded   | 0.44        | 0.21          | 1              |
| grasslands      | 0.54        | 0.10          | 0.12           |
| grasslands      | 0.46        | 0.19          | 0.12           |
| bare/degraded   | 0.37        | 0.32          | 1              |
| low shrub       | 0.49        | 0.14          | 0.013          |
| bare/degraded   | 0.22        | 0.57          | 1              |
| wetlands        | 0.57        | 0.07          | 0.038          |
| grasslands      | 0.52        | 0.12          | 0.12           |
| open bush       | 0.59        | 0.06          | 0.012          |
| bare/degraded   | 0.21        | 0.58          | 1              |
| plantation      | 0.65        | 0.03          | 0.012          |
| bare/degraded   | 0.30        | 0.43          | 1              |
| bare/degraded   | 0.18        | 0.64          | 1              |
| bare/degraded   | 0.23        | 0.55          | 1              |
| grasslands      | 0.49        | 0.14          | 0.12           |
| low shrub       | 0.59        | 0.06          | 0.013          |
| grasslands      | 0.55        | 0.08          | 0.12           |
| settlements     | 0.52        | 0.12          | 0.1            |
| settlements     | 0.54        | 0.10          | 0.1            |
| settlements     | 0.62        | 0.04          | 0.1            |
| wetlands        | 0.66        | 0.02          | 0.038          |
| wetlands        | 0.67        | 0.02          | 0.038          |
| grasslands      | 0.48        | 0.16          | 0.12           |
| forest/thicket  | 0.74        | 0.00          | 0.009          |
| grasslands      | 0.58        | 0.06          | 0.12           |
| wetlands        | 0.61        | 0.05          | 0.038          |
| grasslands      | 0.45        | 0.19          | 0.12           |
| grasslands      | 0.54        | 0.10          | 0.12           |
| grasslands      | 0.40        | 0.26          | 0.12           |
| bare/degraded   | 0.34        | 0.35          | 1              |
| low shrub       | 0.56        | 0.08          | 0.012          |
| grasslands      | 0.52        | 0.12          | 0.12           |
| low shrub       | 0.47        | 0.17          | 0.012          |
| grasslands      | 0.63        | 0.04          | 0.012          |
| low shrub       | 0.49        | 0.15          | 0.013          |
| bare/degraded   | 0.37        | 0.31          | 1              |
| grasslands      | 0.54        | 0.09          | 0.12           |
| open bush       | 0.51        | 0.13          | 0.012          |
| forest/thicket  | 0.71        | 0.01          | 0.009          |
| cultivated land | 0.40        | 0.26          | 0.37           |
| settlements     | 0.38        | 0.29          | 0.1            |
| <b>Average</b>  | <b>0.49</b> | <b>0.19</b>   | <b>0.29</b>    |

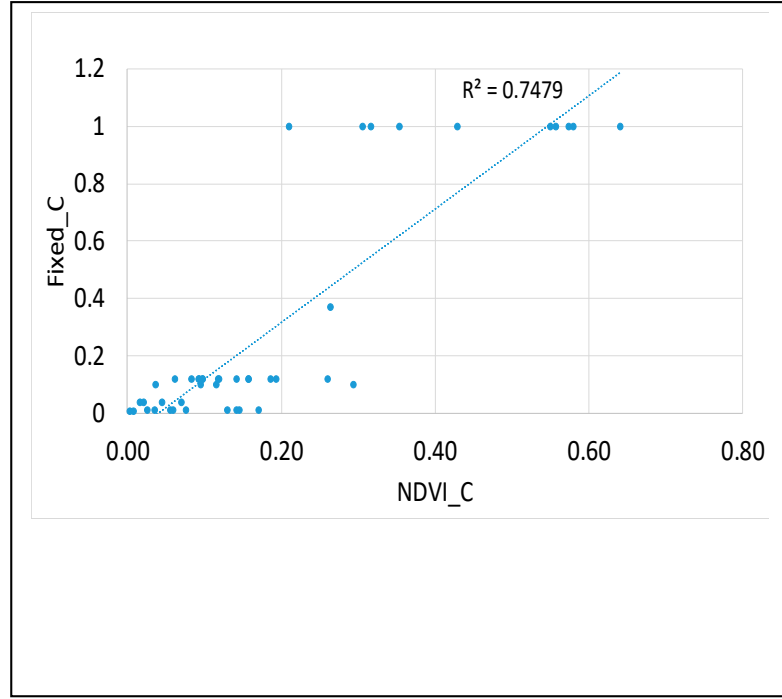

Table S2: The performance of some of the NDVI to *C* conversion methods for use within the study area.

| <b>Vegetation class</b> | <b>NDVI</b> | <b>Map (fixed) <i>C</i></b> | <b>Van der Knijff</b> | <b>Colman</b> | <b>Durigon</b> | <b>Sulistiyo<sup>1</sup></b> | <b>Sulistiyo<sup>2</sup></b> | <b>Suriyaprasit</b> | <b>De Jong</b> |
|-------------------------|-------------|-----------------------------|-----------------------|---------------|----------------|------------------------------|------------------------------|---------------------|----------------|
| Low shrub               | 0.59        | 0.013                       | 0.06                  | -0.009        | -0.086         | 0.149                        | 0.214                        | 0.003               | -0.041         |
| Grasslands              | 0.55        | 0.12                        | 0.08                  | -0.005        | -0.054         | 0.173                        | 0.256                        | 0.004               | -0.015         |
| Settlements             | 0.52        | 0.1                         | 0.12                  | -0.002        | -0.019         | 0.200                        | 0.312                        | 0.005               | 0.013          |
| Wetlands                | 0.66        | 0.038                       | 0.02                  | -0.016        | -0.158         | 0.093                        | 0.143                        | 0.002               | -0.099         |
| Forest/thicket          | 0.74        | 0.009                       | 0.003                 | -0.024        | -0.240         | 0.030                        | 0.090                        | 0.001               | -0.165         |
| <b>Average</b>          | <b>0.61</b> | <b>0.056</b>                | <b>0.06</b>           | <b>-0.011</b> | <b>-0.111</b>  | <b>0.129</b>                 | <b>0.203</b>                 | <b>0.003</b>        | <b>-0.061</b>  |

Table S3: Average MUSLE factors (including fixed *C*) calculated for the catchments.

### T35C

| <b>Factor</b> | <b>Value</b> |
|---------------|--------------|
| <i>LS</i>     | 6.6          |
| <i>C</i>      | 0.098        |
| <i>K</i>      | 0.35         |
| <i>P</i>      | 0.94         |

### Tsitsa catchment

| <b>Factor</b> | <b>Value</b> |
|---------------|--------------|
| <i>LS</i>     | 6.22         |
| <i>C</i>      | 0.12         |
| <i>K</i>      | 0.33         |
| <i>P</i>      | 0.96         |

### Inxu catchment

| <b>Factor</b> | <b>Value</b> |
|---------------|--------------|
| <i>LS</i>     | 6.95         |
| <i>C</i>      | 0.13         |
| <i>K</i>      | 0.35         |
| <i>P</i>      | 0.8          |
